# Supplementary material
Source: publisher site journal article supplement (https://www.dovepress.com/get_supplementary_file.php?f=226936.docx)
Supplement: Supplementary file 1 [file get_supplementary_file.php]

Supplementary Materials

Table S1 PubMed search strategy

| **Line #** | **Search Terms** | **Hits** |
| --- | --- | --- |
| #1 | "Hepatitis B"[Mesh] OR "Hepadnaviridae Infections"[Mesh] OR Hepatitis B[tiab] OR HBV[tiab] OR CHB[tiab] | 83,461 |
| #2 | #1 AND  "Social Stigma"[Mesh] OR stigma[tiab] OR "Prejudice"[Mesh] OR prejudice[tiab] OR "Stereotyping"[Mesh] or stereotyp*[tiab] OR "Social Discrimination"[Mesh] OR discrimination[tiab] or prejud*[tiab] OR discrimin*[tiab] OR stigmatized[tiab] | 659 |
| #3 | Limit #2 to articles published in English | 607 |

Searches were performed on 07 November, 2016

Table S2 EMBASE search strategy

| **Line #** | **Search Terms** | **Hits** |
| --- | --- | --- |
| #1 | 'hepatitis b'/exp | 81,930 |
| #2 | hbv:ab,ti | 51,265 |
| #3 | `hepatitis:ab,ti AND b`:ab,ti | 104,402 |
| #4 | chb:ab,ti | 7,709 |
| #5 | 'hepadnavirus infection'/exp | 82,029 |
| #6 | #1 OR #2 OR #3 OR #4 OR #5 | 136,611 |
| #7 | 'social stigma'/exp | 3,784 |
| #8 | stigma:ab,ti | 17,294 |
| #9 | 'prejudice'/exp | 1,298 |
| #10 | prejudice:ab,ti | 4,023 |
| #11 | prejudiced:ab,ti | 429 |
| #12 | 'stereotypy'/exp | 12,683 |
| #13 | stereotype:ab,ti | 2,587 |
| #14 | stereotyping:ab,ti | 1,258 |
| #15 | stereotypes:ab,ti | 4,404 |
| #16 | discrimination:ab,ti | 103,812 |
| #17 | discriminate:ab,ti | 59,126 |
| #18 | discriminating:ab,ti | 27,854 |
| #19 | discriminated:ab,ti | 19,265 |
| #20 | stigmatized:ab,ti OR stigmatised:ab,ti | 2,328 |
| #21 | #7 OR #8 OR #9 OR #10 OR #11 OR #12 OR #13 OR #14 OR #15 OR #16 OR #17 OR #18 OR #19 OR #20 | 270,459 |
| #22 | #6 AND #21 | 948 |
| #23 | Limit #22 to published in English | 881 |

Searches were performed on 07 November, 2016

Table S3 Cochrane Library search strategy

| **Line #** | **Search Terms** | **Hits** |
| --- | --- | --- |
| #1 | MeSH descriptor: [Hepatitis B] explode all trees | 2,130 |
| #2 | MeSH descriptor: [Hepadnaviridae Infections] explode all trees | 2,130 |
| #3 | "hepatitis B":ti,ab,kw (Word variations have been searched) | 5,701 |
| #4 | "HBV":ti,ab,kw (Word variations have been searched) | 2,263 |
| #5 | "CHB":ti,ab,kw (Word variations have been searched) | 542 |
| #6 | #1 OR #2 OR #3 OR #4 OR #5 | 5,950 |
| #7 | MeSH descriptor: [Social Stigma] explode all trees | 96 |
| #8 | "stigma":ti,ab,kw (Word variations have been searched) | 751 |
| #9 | stigmatized:ti,ab,kw (Word variations have been searched) | 174 |
| #10 | MeSH descriptor: [Prejudice] explode all trees | 324 |
| #11 | prejudice:ti,ab,kw (Word variations have been searched) | 385 |
| #12 | MeSH descriptor: [Stereotyping] explode all trees | 319 |
| #13 | stereotype:ti,ab,kw (Word variations have been searched) | 600 |
| #14 | MeSH descriptor: [Social Discrimination] explode all trees | 48 |
| #15 | "discrimination":ti,ab,kw (Word variations have been searched) | 3,586 |
| #16 | #7 OR #8 OR #9 OR #10 OR #11 OR #12 OR #13 OR #14 OR #15 | 5,090 |
| #17 | #6 AND #16 | 10 |

Searches were performed on 07 November, 2016
